# Supplementary material for: Why does stratospheric aerosol forcing strongly cool the warm pool?
Source: Copernicus journal article supplement (doi:10.5194/egusphere-2024-429), 2024-02-20

$F_i$ 

-3.0

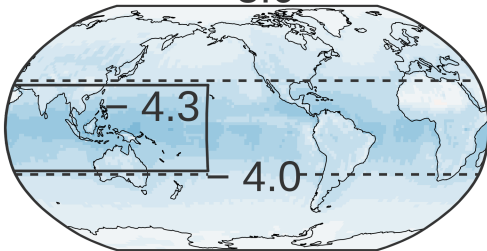 $F_e$ 

-3.6

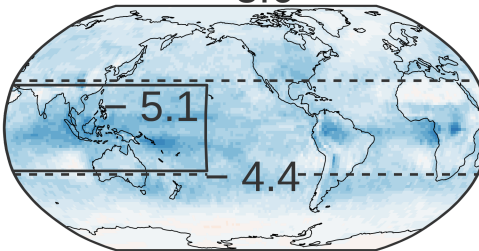

Adj.

-0.6

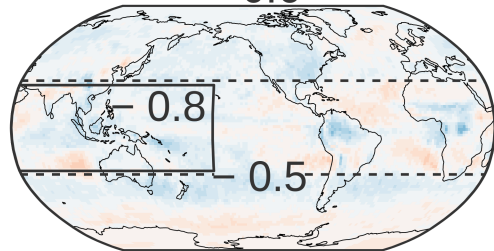 $F_i$  SW

-5.7

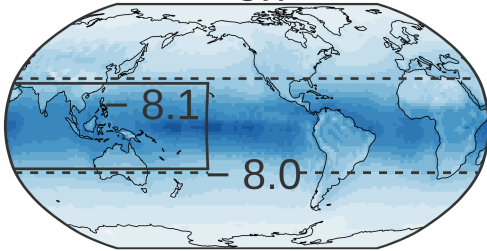 $F_e$  SW

-5.8

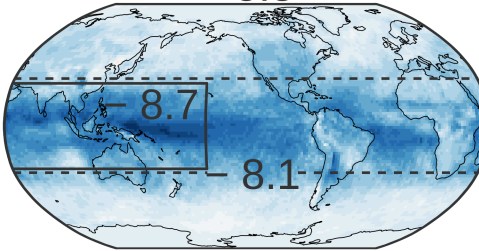

Adj. SW

-0.1

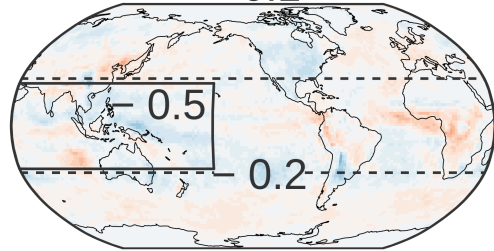 $F_i$  SW clearsky

-8.0

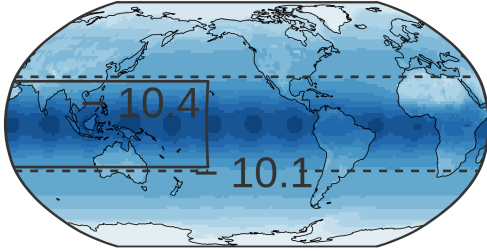 $F_e$  SW clearsky

-8.0

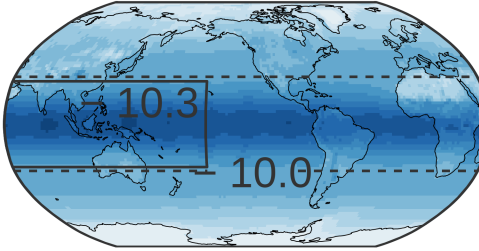

Adj. SW clearsky

0.0

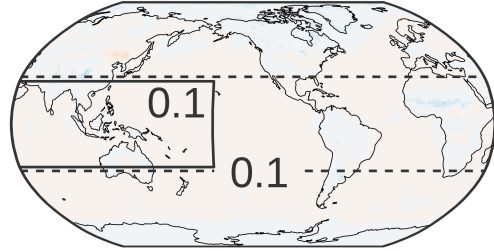 $F_i$  LW

2.7

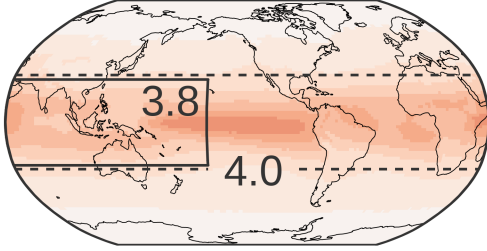 $F_e$  LW

2.2

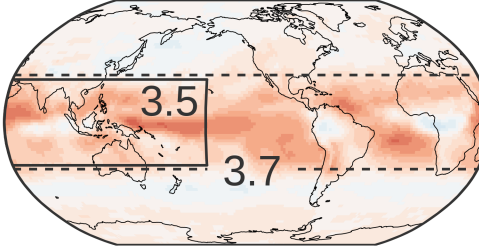

Adj. LW

-0.5

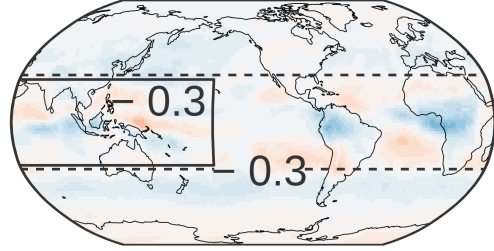 $F_i$  LW clearsky

3.3

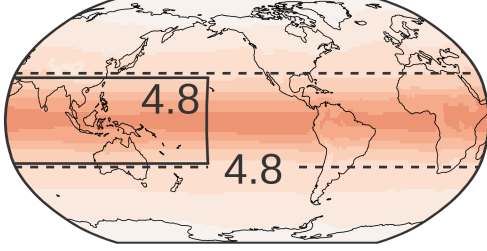 $F_e$  LW clearsky

2.9

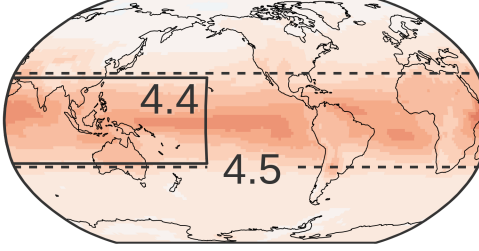

Adj. LW clearsky

-0.3

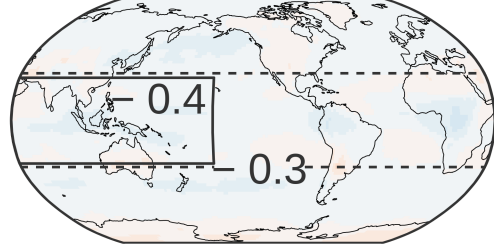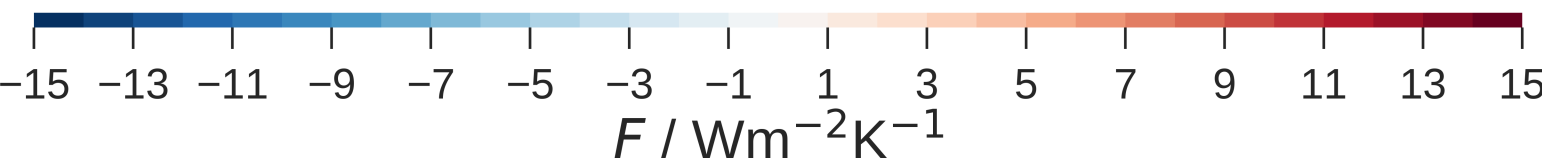

Supplement: Supplementary file [file egusphere-2024-429-AC1-supplement.pdf]
